# Supplementary material for: Supramolecular Nanosheet evolution into BC3N matrix improves the hydrogen evolution reaction activity in the pH universality of highly dispersed Pt nanoparticles
Source: Royal Society of Chemistry journal article supplement (doi:10.1039/d1ta04142h), 2021-01-01
Supplement: d1ta04142h1.pdf [file d1ta04142h1.pdf]

**Supplementary Information for**

**Supramolecular Nanosheets Evolution into BC<sub>3</sub>N Matrix Improves the Hydrogen Evolution Reaction Activity in pH-universal of Highly Dispersed Pt Nanoparticles**

*Xue Zhao,<sup>a,§</sup> Mai Zheng,<sup>a,§</sup> Zhenyang Zhang,<sup>a</sup> Yufeng Wang,<sup>a</sup> Yingtang Zhou,<sup>\*b</sup> Xiaohai Zhou<sup>\*a</sup> and Haibo Zhang<sup>\*a</sup>*

<sup>a</sup>College of Chemistry and Molecular Sciences, Wuhan University, Wuhan 430072, P.R. China

<sup>b</sup>National Engineering Research Center for Marine Aquaculture, Marine Science and Technology College, Zhejiang Ocean University, Zhejiang 316004, P.R. China

<sup>§</sup>These authors contributed equally

\*The corresponding author Email: [haibozhang1980@gmail.com](mailto:haibozhang1980@gmail.com) (Dr. H. Zhang); [zhouyingtang@zjou.edu.cn](mailto:zhouyingtang@zjou.edu.cn) (Prof. Y. T. Zhou); [zxh7954@whu.edu.cn](mailto:zxh7954@whu.edu.cn) (Prof. X. Zhou)

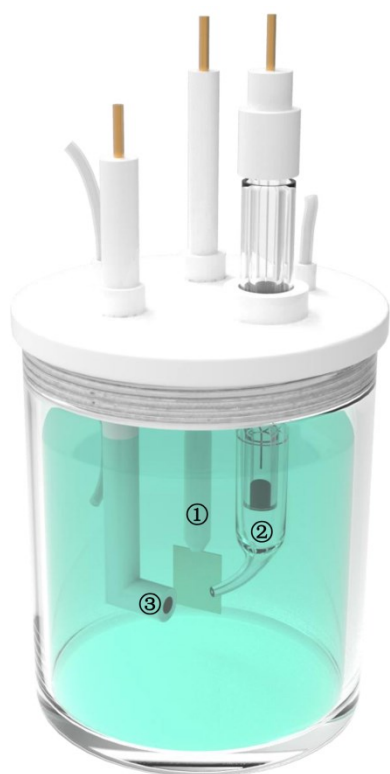

- ① Working electrode
  - ② Reference electrode
  - ③ Counter electrode: graphite rod
- 
- ①—②: about 0.5 cm
  - ②—③: about 1 cm
  - ①—③: about 1 cm

**Figure S1.** Schematic diagram of electrochemical experiment device

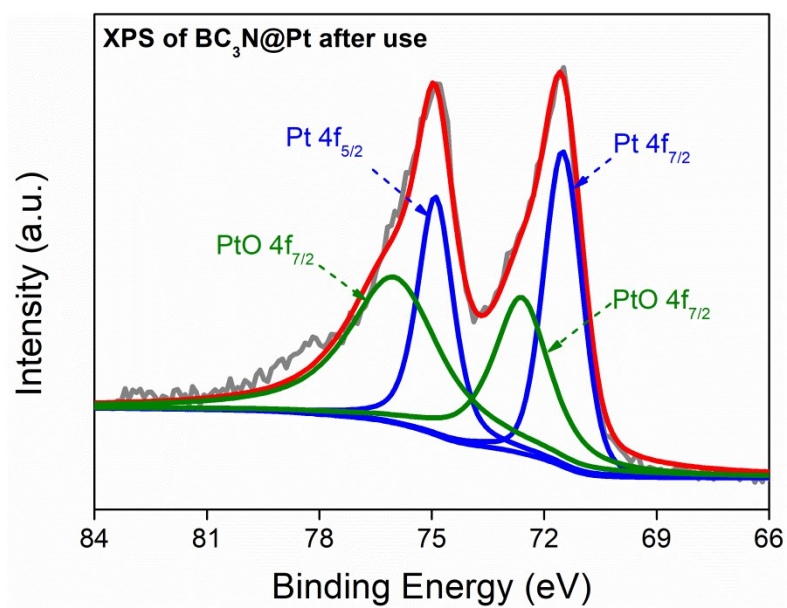

**Figure S2.** XPS (Pt binding energy region) of BCN@Pt after use

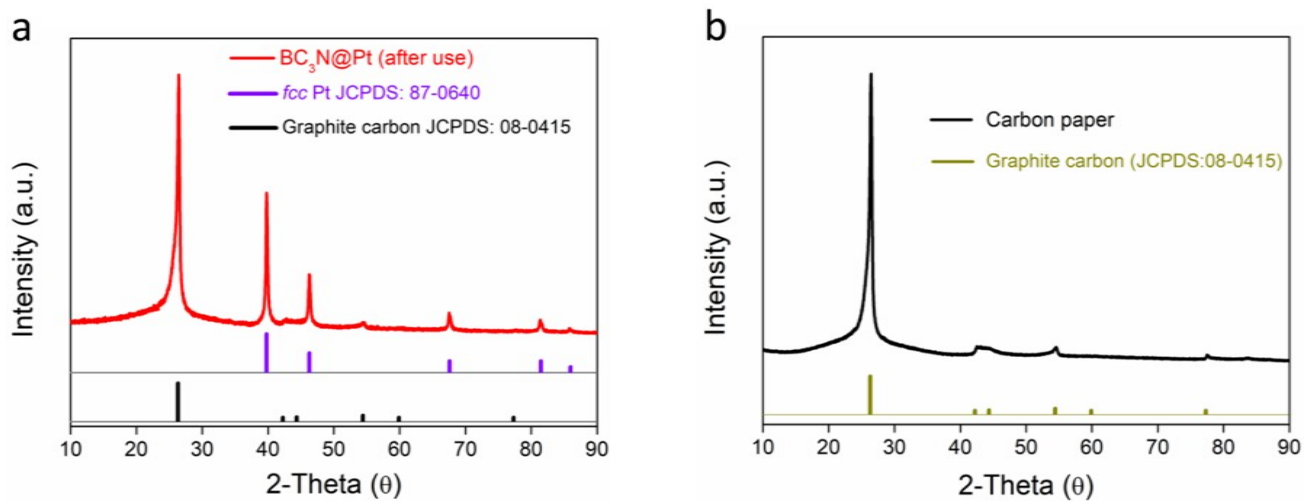

**Figure S3.** a) PXRD of  $BC_3N@Pt$  (on carbon paper) after use; b) PXRD of carbon paper

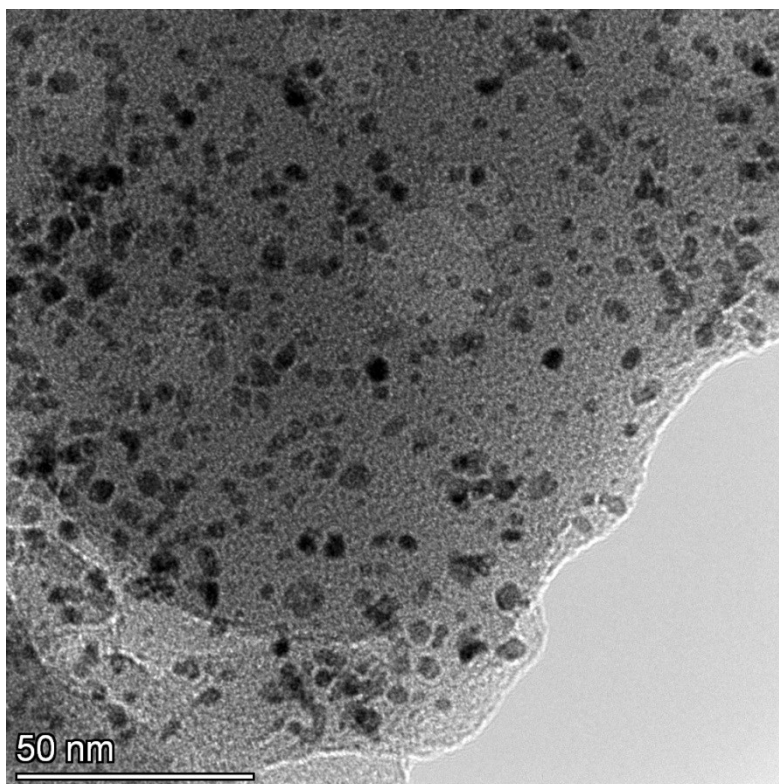

**Figure S4.** TEM image of BC<sub>3</sub>N@Pt after use.

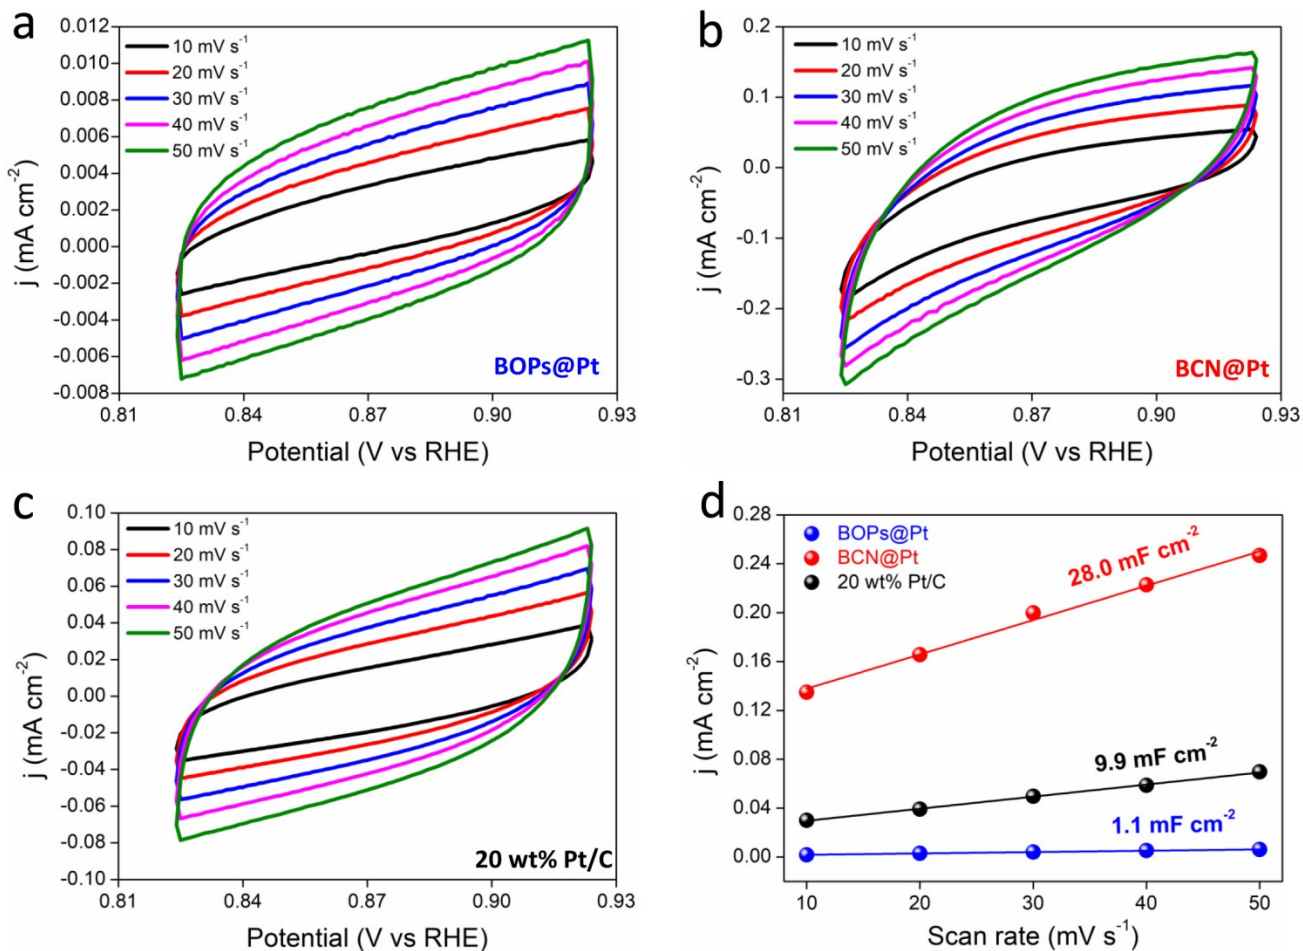

**Figure S5.** Cyclic voltammetry curves at different scanning speeds. a) BOPs@Pt was used as the working electrode; b) BCN@Pt was used as the working electrode; c) 20 wt% Pt/C was used as the working electrode; d) Cdl value converted from cyclic voltammetry data.

| <b>Table S1.</b> Overpotentials of BC <sub>3</sub> N@Pt with other recently reported Pt-based E-HER catalysts. |                                         |                                        |                                                                        |
|----------------------------------------------------------------------------------------------------------------|-----------------------------------------|----------------------------------------|------------------------------------------------------------------------|
| <b>Catalyst</b>                                                                                                | <b>Electrolyte</b>                      | <b><math>\eta_{10}</math><br/>(mV)</b> | <b>Information Sources</b>                                             |
| Pt/MBOPs                                                                                                       | 1 M KOH                                 | 22.8                                   | <i>Journal of Materials Chemistry A</i> , 2020, 8, 7171                |
| Pt/OLC                                                                                                         | 1 M KOH                                 | 38                                     | <i>Nature Energy</i> , 2019, 4, 512-518                                |
| PtNi-O/C                                                                                                       | 1 M KOH                                 | 39.8                                   | <i>Journal of the American Chemical Society</i> , 2018, 140, 9046-9050 |
| PtNWs/SL-Ni(OH) <sub>2</sub>                                                                                   | 1 M KOH                                 | 70                                     | <i>Nature Communications</i> , 2015, 6, 6430                           |
| NiOx/Pt <sub>3</sub> Ni                                                                                        | 1 M KOH                                 | 40                                     | <i>Angewandte Chemie International Edition</i> , 2016, 55, 12859       |
| Pt <sub>3</sub> Ni <sub>2</sub> -NWs/SC                                                                        | 1 M KOH                                 | 42                                     | <i>Nature Communications</i> , 2017, 8, 14580                          |
| Mo <sub>2</sub> C@NC@Pt                                                                                        | 1 M KOH                                 | 47                                     | <i>ACS Applied Materials &amp; Interfaces</i> , 2019, 11, 4047-4056    |
| Pt on WS <sub>2</sub>                                                                                          | 1 M KOH                                 | 45                                     | <i>Advanced Materials</i> , 2018, 30, 1704779                          |
| Pt/NiO@Ni/NF                                                                                                   | 1 M KOH                                 | 34                                     | <i>ACS Catalysis</i> , 2018, 18, 8866-8872                             |
| Pt/Ni(HCO <sub>3</sub> ) <sub>2</sub>                                                                          | 1 M KOH                                 | 44                                     | <i>Angewandte Chemie International Edition</i> , 2019, 58, 5432-5437   |
| CDs/Pt PANI                                                                                                    | 1 M KOH                                 | 56                                     | <i>Applied Catalysis B: Environmental</i> , 2019, 257, 117905          |
| A-CoPt-NC                                                                                                      | 1 M KOH                                 | 32                                     | <i>Angewandte Chemie International Edition</i> , 2019, 58, 9404        |
| C Pt@ZIF-67                                                                                                    | 1 M KOH                                 | 32                                     | <i>Journal of Materials Chemistry A</i> , 2018, 6, 1376-1381           |
| Pd/Cu-Pt                                                                                                       | 1 M KOH                                 | 22.8                                   | <i>Angewandte Chemie International Edition</i> , 2017, 56, 16047       |
| PtCoFe@CN                                                                                                      | 1 M KOH                                 | 45                                     | <i>ACS Applied Materials &amp; Interfaces</i> , 2017, 9, 3596-3601     |
| Pt <sub>5</sub> /HMCS                                                                                          | 1 M KOH                                 | 46.2                                   | <i>Advanced Materials</i> , 2020, 32, 1901349                          |
| Pt@PCM                                                                                                         | 1 M KOH                                 | 105                                    | <i>Science Advances</i> , 2018, 4, eaao6657                            |
| Pt/CNW@PCN-222                                                                                                 | 1 M KOH                                 | 115                                    | <i>Small</i> , 2020, 16, 2005111                                       |
| Pt/GHSs                                                                                                        | 1 M KOH                                 | 27                                     | <i>Small Structures</i> , 2021, 2, 2000017                             |
| Pt1/NMHCS                                                                                                      | 1 M KOH                                 | 40                                     | <i>Advanced Materials</i> , 2021, 2008599                              |
| <b>BC<sub>3</sub>N@Pt</b>                                                                                      | <b>1 M KOH</b>                          | <b>26.1</b>                            | <b><i>This Work</i></b>                                                |
| <b>BC<sub>3</sub>N@Pt</b>                                                                                      | <b>1 M PBS</b>                          | <b>38.5</b>                            |                                                                        |
| <b>BC<sub>3</sub>N@Pt</b>                                                                                      | <b>0.05 H<sub>2</sub>SO<sub>4</sub></b> | <b>23.1</b>                            |                                                                        |

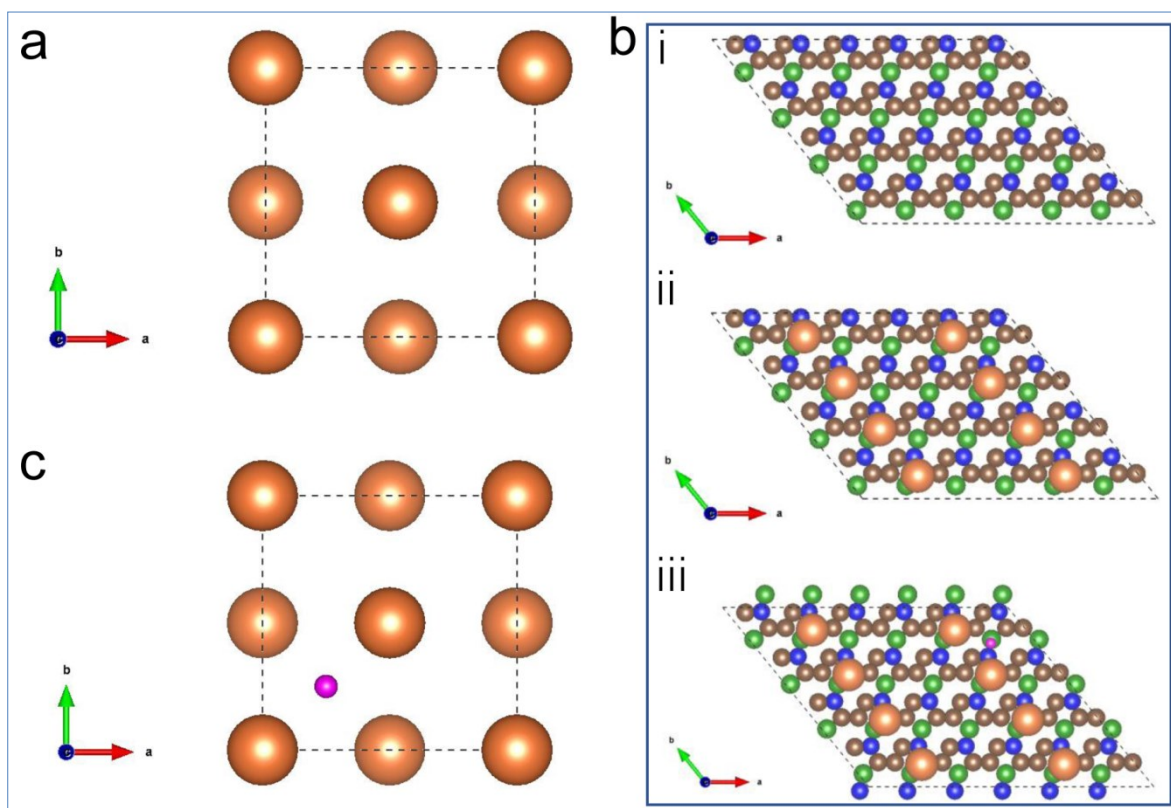

**Figure S6.** a) Crystal structure of Pt; b) Crystal structures of BC<sub>3</sub>N (i), BC<sub>3</sub>N@Pt (ii) and Pt/H\*/BC<sub>3</sub>N (iii); c) Crystal structure model of Pt/ H\*.
